# Supplementary material
Source: ML conference proceedings conference paper supplement (https://proceedings.mlr.press/v51/salah16.html)
Supplement: Supplementary file 1 [file salah16-supp.pdf]

---

# Model-based Co-clustering for High Dimensional Sparse Data

## Supplementary Material

---

**Aghiles Salah**

aghiles.salah@parisdescartes.fr

**Nicoleta Rogovschi**

nicoleta.rogovschi@parisdescartes.fr

**Mohamed Nadif**

mohamed.nadif@parisdescartes.fr

LIPADE, University of Paris Descartes  
45 Rue des Saints-Peres,  
75006, Paris, France

### Appendix A. Parameters Estimation

In this appendix, we provide the derivation details of the maximum likelihood estimates for parameters of the proposed model dbmovMFs.

#### A.1 Maximum Likelihood Estimate

The expectation of the complete data log-likelihood is given by

$$E[L_c(\Theta|\mathcal{X}, \mathbf{Z})] = \sum_h \tilde{z}_{.h} \log \alpha_h + \sum_h \tilde{z}_{.h} \log(c_d(\kappa_h)) + \sum_{h,i,j} \tilde{z}_{ih} w_{jh} \kappa_h \mu_{hh} x_{ij} \quad (1)$$

where  $\tilde{z}_{.h} = \sum_i \tilde{z}_{ih}$ . We first maximize (1) with respect to  $\alpha_h$ , subject to the constraint  $\sum_h \alpha_h = 1$ . The corresponding Lagrangian, up to terms which are not function of  $\alpha_h$ , is given by

$$L(\alpha, \lambda) = \sum_h \tilde{z}_{.h} \log \alpha_h + \lambda_h (1 - \sum_h \alpha_h) \quad (2)$$

Taking derivatives with respect to  $\alpha_h$ 's, we obtain

$$\frac{\partial L(\alpha, \lambda)}{\partial \alpha_h} = \frac{\tilde{z}_{.h}}{\alpha_h} - \lambda$$

setting this derivative to zero yields:

$$\tilde{z}_{.h} = \lambda \alpha_h$$

Summing both sides over all  $h$  yields to  $\lambda = n$ , thereby the maximizing value of the parameter  $\alpha_h$  is given by:

$$\hat{\alpha}_h = \frac{\tilde{z}_{.h}}{n} \quad (3)$$

In the same manner, to maximize expectation (1) with respect to  $\mu_h^w$ , subject to the constraint  $(\mu_h^w)^T \mu_h^w = 1$ ,

we form the corresponding Lagrangian by isolating the terms which depends on  $\mu_h^w$ , which leads to

$$L(\mu, \lambda) = \sum_{h,i,j} \tilde{z}_{ih} w_{jh} \kappa_h \mu_{hh} x_{ij} + \lambda_h (1 - \sum_j w_{jh} \mu_{hh}^2)$$

Taking the derivative with respect to  $\mu_{hh}$ , yields:

$$\frac{\partial L(\mu, \lambda)}{\partial \mu_h} = \sum_{i,j} \tilde{z}_{ih} w_{jh} \kappa_h x_{ij} - 2\lambda w_{.h} \mu_{hh}$$

where  $w_{.h} = \sum_j w_{jh}$ . Setting this derivative to zero, we obtain:

$$\lambda \mu_{hh} = \frac{\sum_{i,j} \tilde{z}_{ih} w_{jh} \kappa_h x_{ij}}{2w_{.h}}$$

Thus,

$$\lambda^2 \mu_{hh}^2 = \frac{(\sum_{i,j} \tilde{z}_{ih} w_{jh} \kappa_h x_{ij})^2}{4w_{.h}^2}$$

Multiplying both sides by  $w_{.h}$ , yields:

$$\lambda^2 w_{.h} \mu_{hh}^2 = \frac{(\sum_{i,j} \tilde{z}_{ih} w_{jh} \kappa_h x_{ij})^2}{4w_{.h}} \quad (4)$$

hence, we obtain

$$\begin{aligned} \lambda &= \kappa_h \frac{\sqrt{w_{.h} (\sum_{i,j} \tilde{z}_{ih} w_{jh} x_{ij})^2}}{2w_{.h}} \\ &= \kappa_h \frac{\|\mathbf{r}_h^w\|}{2w_{.h}} \end{aligned}$$

where  $\mathbf{r}_h^w$  is a  $d$  dimensional vector: let  $j' = 1, \dots, d$ ,  $r_{hj'}^w = r_{hj'}^w = \sum_{i,j} \tilde{z}_{ih} w_{jh} x_{ij}$  if  $w_{jh} = 1$  and  $r_{hj'}^w = 0$ , otherwise. Hence, the maximizing value of the param-

eter  $\mu_{hh}$  is given by:

$$\begin{aligned}\hat{\mu}_{hh} &= \frac{\sum_{i,j} \tilde{z}_{ih} w_{jh} x_{ij}}{\|\mathbf{r}_h^{\mathbf{w}}\|} \\ &= \frac{\sum_{i,j} \tilde{z}_{ih} w_{jh} x_{ij}}{\sqrt{w_{.h} (\sum_{i,j} \tilde{z}_{ih} w_{jh} x_{ij})^2}} \\ &= \pm \frac{1}{\sqrt{w_{.h}}}\end{aligned}\quad (5)$$

according to whether  $r_h^{\mathbf{w}} = \sum_{i,j} \tilde{z}_{ih} w_{jh} x_{ij}$  is positive or negative. It follows from equation (5) that given the column partition  $\mathbf{w}$  and the sign of  $r_h^{\mathbf{w}}$ , the centroid parameter  $\mu_h^{\mathbf{w}}$  can be deduced directly.

Next we concentrate on maximizing equation (1), with respect to the concentration parameters  $\kappa_h$ 's, subject to the constraint  $\kappa_h > 0, \forall h$ . The Lagrangian up to terms which do not contains  $\kappa_h$  is given by

$$L(\kappa) = \sum_h \tilde{z}_{.h} \log(c_d(\kappa_h)) + \sum_{h,i,j} \tilde{z}_{ih} w_{jh} \kappa_h \hat{\mu}_{hh} x_{ij} \quad (6)$$

note that, by KKT conditions, the Lagrangian multiplier for the constraint  $\kappa_h > 0$  has to be equal to zero. Taking the partial derivative of equation (6) with respect to  $\kappa_h$ , we obtain

$$\frac{\partial L(\kappa)}{\partial \kappa_h} = \tilde{z}_{.h} \frac{c'_d(\kappa_h)}{c_d(\kappa_h)} + \sum_{i,j} \tilde{z}_{ih} w_{jh} \hat{\mu}_{hh} x_{ij}$$

Setting this derivative equal to zero, leads to:

$$\frac{c'_d(\kappa_h)}{c_d(\kappa_h)} = - \frac{\hat{\mu}_{hh} \times \sum_{i,j} \tilde{z}_{ih} w_{jh} x_{ij}}{\tilde{z}_{.h}}$$

replacing  $\hat{\mu}_{hh}$  by  $\frac{\sum_{i,j} \tilde{z}_{ih} w_{jh} x_{ij}}{\|\mathbf{r}_h^{\mathbf{w}}\|}$  (see, equation 5), we obtain:

$$\frac{c'_d(\kappa_h)}{c_d(\kappa_h)} = - \frac{\|\mathbf{r}_h^{\mathbf{w}}\|}{\tilde{z}_{.h} \hat{w}_{.h}}$$

let  $s = d/2 - 1$ , then:

$$\begin{aligned}c'_d(\kappa_h) &= \frac{s\kappa_h^{s-1} (2\pi)^{s+1} I_s(\kappa_h) - \kappa_h^s (2\pi)^{s+1} I'_s(\kappa_h)}{(2\pi)^{2s+2} I_s^2(\kappa_h)} \\ &= \frac{s\kappa_h^{s-1}}{(2\pi)^{s+1} I_s(\kappa_h)} - \frac{\kappa_h^s I'_s(\kappa_h)}{(2\pi)^{s+1} I_s^2(\kappa_h)} \\ &= c_d(\kappa_h) \left( \frac{s}{\kappa_h} - \frac{I'_s(\kappa_h)}{I_s(\kappa_h)} \right)\end{aligned}\quad (7)$$

Hence,

$$\frac{-c'_d(\kappa_h)}{c_d(\kappa_h)} = \frac{I_{s+1}(\kappa_h)}{I_s(\kappa_h)} = \frac{I_{d/2}(\kappa_h)}{I_{d/2-1}(\kappa_h)} \quad (8)$$

The above equation (8), arises from the use of the following recurrence formula [Abramowitz and Stegun, 1964]:

$$\kappa_h I_{s+1}(\kappa_h) = \kappa_h I'_s(\kappa_h) - s I_s(\kappa_h) \quad (9)$$

Note that computing the maximizing value  $\hat{\kappa}_h$  from equation (7) implies to inverse a ratio of Bessel function, a problem for which there is no closed-form solution. Thus, Following Banerjee et al. [2005], we can derive an accurate approximation of the concentration parameter, by using the following continued fraction formula:

$$\frac{I_{d/2}(\kappa_h)}{I_{d/2-1}(\kappa_h)} = \frac{1}{\frac{d}{\kappa_h} + \frac{1}{\frac{d+2}{\kappa_h} + \dots}} \quad (10)$$

Letting  $\bar{r}_h^{\mathbf{w}} = \frac{\|\mathbf{r}_h^{\mathbf{w}}\|}{\tilde{z}_{.h} \hat{w}_{.h}} = \frac{I_{d/2}(\kappa_h)}{I_{d/2-1}(\kappa_h)}$  and using equation (10), we obtain:

$$\frac{1}{\bar{r}_h^{\mathbf{w}}} \approx \frac{d}{\kappa_h} + \bar{r}_h^{\mathbf{w}}$$

which yields the following approximation:

$$\hat{\kappa}_h = \frac{d\bar{r}_h^{\mathbf{w}}}{1 - (\bar{r}_h^{\mathbf{w}})^2}$$

Finally, the authors in [Banerjee et al., 2005] have empirically shown that adding the following correction term  $\frac{-(\bar{r}_h^{\mathbf{w}})^3}{1 - (\bar{r}_h^{\mathbf{w}})^2}$  results in a better approximation of  $\hat{\kappa}_h$ , which leads to:

$$\hat{\kappa}_h = \frac{d\bar{r}_h^{\mathbf{w}} - (\bar{r}_h^{\mathbf{w}})^3}{1 - (\bar{r}_h^{\mathbf{w}})^2} \quad (11)$$

As opposed to the classical movMFs where it is easy to verify that  $\bar{r}_h \leq 1$  (see equation 6c) given the definition of  $\mathbf{r}$ , it is not straightforward to verify that  $\bar{r}_h^{\mathbf{w}} \leq 1$ , without careful analysis. Such a result is imperative, to guarantee that the concentration parameters are positive, i.e.,  $\kappa_h > 0, \forall h$ , specially when using the approximation of equation (11). Hence, the following Proposition provides theoretical guarantee about the fact that  $0 \leq \bar{r}_h^{\mathbf{w}} \leq 1$ , thereby it ensures that  $\kappa_h$  estimated from equation (11) is always positive.

**Proposition 1** *Let  $\mathbf{r}$  be a non-zero vector in  $\mathbb{R}^d$  (i.e.,  $\mathbf{r} = (r_1, \dots, r_d)^T$ , such as  $d \geq 2$ ) which results from a weighted sum of  $n$   $d$ -dimensional unit vector, i.e.,  $\mathbf{r} = \sum_i p_i \mathbf{x}_i$ ,  $\mathbf{x}_i \in \mathbb{R}^d$  and  $\|\mathbf{x}_i\| = 1, \forall i \in \{1, \dots, n\}$ ,  $n \geq 2$ , the weights  $p_i \geq 0, \forall i$ . Let  $\mathbf{r}^d$  be a vector in  $\mathbb{R}^d$ , such*

as all its components are equal to the sum of elements of  $\mathbf{r}$  (i.e,  $\mathbf{r}_1^d = \dots = \mathbf{r}_d^d = \sum_{j=1}^d r_j$ ). Then  $0 < \|\mathbf{r}^d\| \leq d \times \sum_i p_i$  with equality only if all unit vectors  $\mathbf{x}_i$  are equal/collinear.

**Proof.** We define two vectors  $\mathbf{d}$  and  $\mathbf{r}^+$  in  $\mathbb{R}^d$  as follows:  $\mathbf{d} = \frac{1}{\sqrt{d}}\mathbb{1}$  and  $r_j^+ = |r_j|$ ,  $\forall j \in \{1, \dots, d\}$ . as  $\|\mathbf{r}^d\|$ ,  $d$  and  $\|\mathbf{r}\|$  are all positive, we aim to show that  $\frac{\|\mathbf{r}^d\|}{d \times \sum_i p_i} \leq 1$ , we have:

$$\begin{aligned} \frac{\|\mathbf{r}^d\|}{d} &= \frac{\sqrt{(r_1^d)^2 + \dots + (r_d^d)^2}}{d} \\ &= \frac{\sqrt{d \times \left(\sum_j r_j\right)^2}}{d} \\ &= \frac{\sqrt{d} \times \left|\sum_j r_j\right|}{d} \\ &= \frac{1}{\sqrt{d}} \times \left|\sum_j r_j\right| \\ &\leq \frac{1}{\sqrt{d}} \times \sum_j |r_j| \\ &\leq \mathbf{d}^t \cdot \mathbf{r}^+ \\ &\leq \|\mathbf{d}\| \|\mathbf{r}^+\| \cos(\mathbf{d}, \mathbf{r}^+) \end{aligned}$$

by definition of  $\mathbf{r}^+$  and  $\mathbf{d}$ , we have  $\|\mathbf{r}^+\| = \|\mathbf{r}\|$  thereby  $\|\mathbf{r}^+\| \leq \sum_i p_i$  (i.e,  $\|\mathbf{r}^+\| = \|\mathbf{r}\| = \|p_1 \mathbf{x}_1 + \dots + p_n \mathbf{x}_n\| \leq \|p_1 \mathbf{x}_1\| + \dots + \|p_n \mathbf{x}_n\| = \sum_i p_i$ ) and  $\|\mathbf{d}\| = 1$ , hence

$$\frac{\|\mathbf{r}^d\|}{d} \leq \sum_i p_i \times \cos(\mathbf{d}, \mathbf{r}^+) \quad (12)$$

dividing both sides by  $\sum_i p_i$ , we get

$$\frac{\|\mathbf{r}^d\|}{d \times \sum_i p_i} \leq \cos(\mathbf{d}, \mathbf{r}^+) \quad (13)$$

by definition both  $\mathbf{d}$  and  $\mathbf{r}^+$  are non-zero vectors and lie on the first orthant of  $d$ -dimensional unit hypersphere, thus,

$$0 < \frac{\|\mathbf{r}^d\|}{d \times \sum_i p_i} \leq \cos(\mathbf{d}, \mathbf{r}^+) \leq 1$$

The equality holds only if  $\mathbf{d}$  and  $\mathbf{r}^+$  are collinear, thereby all components of  $\mathbf{r}$  are equal.

## Appendix B. Experiments

### B.1 Evaluation measures

In this appendix we give some details about the clustering-evaluation measures—Normalized Mutual

Information NMI and Adjusted Rand Index ARI—used in our experiments. The NMI is estimated as follows

$$NMI = \frac{\sum_{kl} \pi_{h\ell} \log \frac{\pi_{h\ell}}{\pi_h \pi_\ell}}{\sqrt{(\sum_h \pi_h \log \pi_h)(\sum_\ell \hat{\pi}_\ell \log \hat{\pi}_\ell)}}$$

where  $\pi_h$  denotes the proportion of elements in the resulting cluster  $h$ , while  $\hat{\pi}_\ell$  denotes the proportion of class (true cluster)  $\ell$ , i.e,  $\pi_h = n_h/n$ ,  $\hat{\pi}_\ell = \hat{n}_\ell/n$ ;  $n$ ,  $n_h$  and  $\hat{n}_\ell$  denote the total number of objects, the number of objects in cluster  $h$  and the number of objects in class  $\ell$ , respectively. The proportion of objects that are common to cluster  $h$  and class  $\ell$  is denoted by  $\pi_{h\ell}$ . Intuitively NMI quantifies how much the estimated clustering is informative about the true clustering, it can be shown that NMI lies in the range  $[0, 1]$ . If the resulting clustering and the true one are identical, then  $NMI = 1$ . However, when the obtained clusters are substantially different from the true classes then the value of the NMI will be low and close to zero for a random clustering.

The ARI measures the correspondence between two clusterings. As it has been demonstrated by Milligan and Cooper [1986], ARI is a superior measure compared to several other measures, for assessing the correspondence between two clusterings. Formally, the ARI is given by

$$ARI = \frac{\sum_{h,\ell} \binom{n_{h\ell}}{2} - \sum_h \binom{n_h}{2} \sum_\ell \binom{n_\ell}{2} / \binom{n}{2}}{\frac{1}{2} [\sum_h \binom{n_h}{2} + \sum_\ell \binom{n_\ell}{2}] - \sum_h \binom{n_h}{2} \sum_\ell \binom{n_\ell}{2} / \binom{n}{2}}$$

where  $n_{h,\ell}$ ,  $n_\ell$ ,  $n_h$  denote respectively the number of objects in cluster  $h$ , in class  $\ell$ , that are in cluster  $h$  as well as in class  $\ell$ .

Intuitively, the ARI measures the degree of agreement between an estimated clustering and a reference clustering. Hence,  $ARI = 1$  if the estimated clustering and the true one agree perfectly, and ARI is close to zero for random clustering.

## References

- Milton Abramowitz and Irene A Stegun. *Handbook of mathematical functions: with formulas, graphs, and mathematical tables*. Number 55. Courier Corporation, 1964.
- Arindam Banerjee, Inderjit S. Dhillon, Joydeep Ghosh, and Suvrit Sra. Clustering on the unit hypersphere using von mises-fisher distributions. *J. Mach. Learn. Res.*, 6:1345–1382, 2005.
- Glenn W Milligan and Martha C Cooper. A study of the comparability of external criteria for hierarchical cluster analysis. *Multivariate Behavioral Research*, 21(4):441–458, 1986.
